# Supplementary material
Source: PubMed Central journal article supplement (PMC3362785)
Supplement: supp_111.044461_044461supplemental_figure_1.pdf [file supp_111.044461_044461supplemental_figure_1.pdf]

Supplemental Material

Article title: Effect of Aging on mRNA Profiles of Drug Metabolizing Enzymes and Transporters in Livers of Male and Female Mice

Article authors: Zidong Donna Fu, Iván L. Csanaky, and Curtis D. Klaassen

Journal Drug Metabolism and Disposition

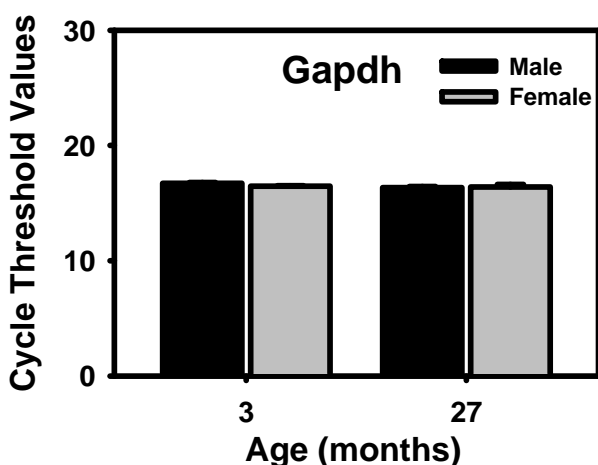

**Supplemental Fig. 1** The real-time qRT-PCR validates that Gapdh mRNA did not have sex- or age-differences. Total RNA was extracted from livers of male and female mice at 3 and 27 months of age. The mRNA of the Gapdh was quantified by real-time qRT-PCR and the cycle threshold value was shown. The primer sequences for GAPDH (NM\_008084.2) were 5'-aacttggcattgtggaagg-3' (forward) and 5'-ggatgcagggatgatgttct-3' (reverse). There were not differences between sex or age of Gapdh mRNA.
