# Supplementary material
Source: PubMed Central journal article supplement (PMC3362785)
Supplement: supp_111.044461_044461supplemental_table_1.pdf [file supp_111.044461_044461supplemental_table_1.pdf]

## Supplemental Material

Article title: Effect of Aging on mRNA Profiles of Drug Metabolizing Enzymes and Transporters in Livers of Male and Female Mice

Article authors: Zidong Donna Fu, Iván L. Csanaky, and Curtis D. Klaassen

Journal Drug Metabolism and Disposition

Supplementary Table 1. Oligonucleotide probes for quantifying mouse Comt

(Accession No: NM\_001111063) mRNA by the branched DNA assay

| Target Region | Function | Sequence                                         |
|---------------|----------|--------------------------------------------------|
| 301-319       | CE       | ggatgcgctgctccttTgTTTTctctggaaagaaagt            |
| 337-355       | CE       | ggtctccaggcttTgCGTgTTTTctctggaaagaaagt           |
| 476-497       | CE       | caataagctcctagctccagcaTTTTctctggaaagaaagt        |
| 550-572       | CE       | tcagggttaatcctcatggtgagTTTTctctggaaagaaagt       |
| 356-373       | LE       | cctccaggacgctctgggTTTTaggcataggaccggtgtct        |
| 374-398       | LE       | ttctctgagcagtaggtatcaatggTTTTaggcataggaccggtgtct |
| 399-417       | LE       | cacgttcatggcccactccTTTTaggcataggaccggtgtct       |
| 436-456       | LE       | ccgaatcactgcatccatgatTTTTaggcataggaccggtgtct     |
| 457-475       | LE       | ccagcgagggcctgtactTTTTaggcataggaccggtgtct        |
| 498-515       | LE       | cgcacggctgagtagccaTTTTaggcataggaccggtgtct        |
| 320-336       | BL       | Tgctgcacatggcgca                                 |
| 418-435       | BL       | Tggccttttgcgtcacc                                |
| 516-531       | BL       | Cagcaggcgggccatt                                 |
| 532-549       | BL       | Aagcctggctccagggtg                               |

- CE, capture extender; LE, label extender; BL, blocker.
